# Supplementary material for: A Longitudinal Assessment of Diet Quality and Risks Associated with Malnutrition in Socioeconomic and Racially Diverse Adults
Source: PubMed Central journal article supplement (PMC6770204; doi:10.3390/nu11092046), 2019-09-02
Supplement: nutrients-11-02046-s001.pdf [file nutrients-11-02046-s001.pdf]

Table 1. MAR and NAR scores of HANDLS study sample at Baseline, Wave 3 and Wave 4.

Superscripts with different letters in a row with each age group are significantly different  $p < 0.05$ . Abbreviations: HANDLS – Healthy Aging in

| MAR and NAR scores, $\bar{X} \pm SE$ | Baseline age <50 years          |                                |                                 | Baseline age $\geq 50$ years   |                                |                                 |
|--------------------------------------|---------------------------------|--------------------------------|---------------------------------|--------------------------------|--------------------------------|---------------------------------|
|                                      | Baseline<br>n=1194              | Wave 3<br>n=1190               | Wave 4<br>n=1198                | Baseline<br>n=983              | Wave 3<br>n=950                | Wave 4<br>n=870                 |
| MAR                                  | 78.30 $\pm$ 0.54 <sup>a</sup>   | 77.49 $\pm$ 0.40 <sup>a</sup>  | 77.90 $\pm$ 0.41 <sup>a</sup>   | 77.68 $\pm$ 0.60 <sup>a</sup>  | 76.93 $\pm$ 0.45 <sup>a</sup>  | 74.24 $\pm$ 0.51 <sup>b</sup>   |
| NAR Calcium                          | 0.647 $\pm$ 0.008 <sup>a</sup>  | 0.735 $\pm$ 0.007 <sup>b</sup> | 0.697 $\pm$ 0.007 <sup>c</sup>  | 0.591 $\pm$ 0.009 <sup>a</sup> | 0.665 $\pm$ 0.009 <sup>b</sup> | 0.539 $\pm$ 0.011 <sup>c</sup>  |
| NAR Copper                           | 0.899 $\pm$ 0.005 <sup>a</sup>  | 0.904 $\pm$ 0.005 <sup>a</sup> | 0.879 $\pm$ 0.005 <sup>b</sup>  | 0.899 $\pm$ 0.005 <sup>a</sup> | 0.893 $\pm$ 0.006 <sup>a</sup> | 0.860 $\pm$ 0.006 <sup>b</sup>  |
| NAR Iron                             | 0.788 $\pm$ 0.007 <sup>a</sup>  | 0.833 $\pm$ 0.007 <sup>b</sup> | 0.856 $\pm$ 0.007 <sup>c</sup>  | 0.941 $\pm$ 0.005 <sup>a</sup> | 0.953 $\pm$ 0.004 <sup>a</sup> | 0.809 $\pm$ 0.012 <sup>b</sup>  |
| NAR Magnesium                        | 0.629 $\pm$ 0.007 <sup>a</sup>  | 0.676 $\pm$ 0.006 <sup>b</sup> | 0.669 $\pm$ 0.007 <sup>b</sup>  | 0.615 $\pm$ 0.007 <sup>a</sup> | 0.654 $\pm$ 0.007 <sup>b</sup> | 0.633 $\pm$ 0.008 <sup>ab</sup> |
| NAR Phosphorus                       | 0.951 $\pm$ 0.004 <sup>a</sup>  | 0.970 $\pm$ 0.003 <sup>b</sup> | 0.969 $\pm$ 0.003 <sup>b</sup>  | 0.948 $\pm$ 0.004 <sup>a</sup> | 0.961 $\pm$ 0.004 <sup>a</sup> | 0.959 $\pm$ 0.004 <sup>a</sup>  |
| NAR Selenium                         | 0.969 $\pm$ 0.003 <sup>a</sup>  | 0.977 $\pm$ 0.003 <sup>a</sup> | 0.978 $\pm$ 0.003 <sup>a</sup>  | 0.962 $\pm$ 0.004 <sup>a</sup> | 0.969 $\pm$ 0.004 <sup>a</sup> | 0.970 $\pm$ 0.003 <sup>a</sup>  |
| NAR Zinc                             | 0.860 $\pm$ 0.006 <sup>a</sup>  | 0.865 $\pm$ 0.006 <sup>a</sup> | 0.837 $\pm$ 0.006 <sup>b</sup>  | 0.837 $\pm$ 0.007 <sup>a</sup> | 0.843 $\pm$ 0.007 <sup>a</sup> | 0.801 $\pm$ 0.007 <sup>b</sup>  |
| NAR Thiamin                          | 0.880 $\pm$ 0.006 <sup>a</sup>  | 0.906 $\pm$ 0.005 <sup>b</sup> | 0.893 $\pm$ 0.005 <sup>ab</sup> | 0.863 $\pm$ 0.006 <sup>a</sup> | 0.890 $\pm$ 0.006 <sup>b</sup> | 0.868 $\pm$ 0.007 <sup>a</sup>  |
| NAR Folate                           | 0.833 $\pm$ 0.007 <sup>ab</sup> | 0.851 $\pm$ 0.006 <sup>a</sup> | 0.823 $\pm$ 0.006 <sup>b</sup>  | 0.807 $\pm$ 0.007 <sup>a</sup> | 0.836 $\pm$ 0.007 <sup>b</sup> | 0.795 $\pm$ 0.008 <sup>a</sup>  |
| NAR Niacin                           | 0.941 $\pm$ 0.004 <sup>a</sup>  | 0.957 $\pm$ 0.003 <sup>b</sup> | 0.951 $\pm$ 0.004 <sup>ab</sup> | 0.926 $\pm$ 0.005 <sup>a</sup> | 0.938 $\pm$ 0.005 <sup>a</sup> | 0.936 $\pm$ 0.005 <sup>a</sup>  |

Neighborhoods of Diversity across the Life Span, MAR - Mean Adequacy Ratio, NAR- Nutrient Adequacy Ratio.

|                             |                          |                          |                          |                          |                           |                          |
|-----------------------------|--------------------------|--------------------------|--------------------------|--------------------------|---------------------------|--------------------------|
| NAR Riboflavin              | 0.938±0.004 <sup>a</sup> | 0.937±0.004 <sup>a</sup> | 0.941±0.004 <sup>a</sup> | 0.934±0.005 <sup>a</sup> | 0.936±0.005 <sup>a</sup>  | 0.925±0.005 <sup>a</sup> |
| NAR Vitamin A               | 0.794±0.040 <sup>a</sup> | 0.609±0.009 <sup>b</sup> | 0.610±0.009 <sup>b</sup> | 0.816±0.049 <sup>a</sup> | 0.641±0.009 <sup>b</sup>  | 0.620±0.010 <sup>b</sup> |
| NAR Vitamin B <sub>6</sub>  | 0.883±0.006 <sup>a</sup> | 0.900±0.005 <sup>a</sup> | 0.881±0.006 <sup>a</sup> | 0.817±0.007 <sup>a</sup> | 0.847±0.007 <sup>b</sup>  | 0.714±0.012 <sup>c</sup> |
| NAR Vitamin B <sub>12</sub> | 0.916±0.005 <sup>a</sup> | 0.915±0.006 <sup>a</sup> | 0.905±0.006 <sup>a</sup> | 0.906±0.006 <sup>a</sup> | 0.914±0.006 <sup>ab</sup> | 0.874±0.007 <sup>c</sup> |
| NAR Vitamin C               | 0.727±0.024 <sup>a</sup> | 0.479±0.012 <sup>b</sup> | 0.534±0.010 <sup>b</sup> | 0.692±0.025 <sup>a</sup> | 0.500±0.013 <sup>b</sup>  | 0.568±0.012 <sup>c</sup> |
| NAR Vitamin D               | 0.231±0.006 <sup>a</sup> | 0.193±0.006 <sup>b</sup> | 0.283±0.007 <sup>c</sup> | 0.250±0.007 <sup>a</sup> | 0.185±0.006 <sup>b</sup>  | 0.268±0.008 <sup>a</sup> |
| NAR Vitamin E               | 0.427±0.007 <sup>a</sup> | 0.468±0.007 <sup>b</sup> | 0.537±0.007 <sup>c</sup> | 0.401±0.008 <sup>a</sup> | 0.453±0.008 <sup>b</sup>  | 0.483±0.008 <sup>c</sup> |

---

Table S2. Mixed effects regression with Mean Adequacy Ratio as outcome:  
 Baseline, Waves 3 and 4 Healthy Aging in Neighborhoods of Diversity across the Life Span study

|                           | Coefficients | p      |
|---------------------------|--------------|--------|
| Intercept                 | 6736.76      | <0.001 |
| cenAge                    | 103.28       |        |
| Age_Groupold              | 582.58       | <0.01  |
| Sex Men                   | -361.95      | <0.05  |
| Race AA                   | -421.29      | <0.01  |
| PovStatBelow              | -589.83      | <0.001 |
| cenEnergy                 | 214.57       | <0.001 |
| UsedCigEver               | -554.04      | <0.001 |
| EducationHS≥HS            | 287.22       | <0.001 |
| cenAge:Age_Groupold       | -308.10      |        |
| cenAge:SexMen             | -220.61      |        |
| cenAge:RaceAA             | 194.86       |        |
| cenAge:PovStatBelow       | -165.82      |        |
| cenAge:cenEnergy          | -15.29       |        |
| Age_Groupold:SexMen       | -15.38       |        |
| Age_Groupold:RaceAA       | 367.48       |        |
| Age_Groupold:PovStatBelow | 142.33       |        |
| Age_Groupold:cenEnergy    | -82.07       | <0.01  |
| SexMen:RaceAA             | 322.74       |        |
| SexMen:PovStatBelow       | 510.61       | <0.05  |
| SexMen:cenEnergy          | -78.22       | <0.001 |
| RaceAA:PovStatBelow       | 639.64       | <0.01  |

|                                         |         |        |
|-----------------------------------------|---------|--------|
| RaceAA:cenEnergy                        | -44.08  | <0.01  |
| PovStatBelow:cenEnergy                  | -40.90  | <0.05  |
| cenAge:Age_Groupold:SexMen              | 154.90  |        |
| cenAge:Age_Groupold:RaceAA              | -246.47 |        |
| cenAge:Age_Groupold:PovStatBelow        | 486.38  |        |
| cenAge:Age_Groupold:cenEnergy           | 76.09   | <0.01  |
| cenAge:SexMen:RaceAA                    | 38.58   |        |
| cenAge:SexMen:PovStatBelow              | 28.35   |        |
| cenAge:SexMen:cenEnergy                 | 35.12   |        |
| cenAge:RaceAA::PovStatBelow             | -179.27 |        |
| cenAge:RaceAA:cenEnergy                 | -1.43   |        |
| cenAge:PovStatBelow:cenEnergy           | -45.97  | <0.05  |
| Age_Groupold:SexMen:RaceAA              | -769.92 |        |
| Age_Groupold:SexMen:PovStatBelow        | -805.12 |        |
| Age_Groupold:SexMen:cenEnergy           | 78.64   | <0.05  |
| Age_Groupold:RaceAA:PovStatBelow        | -541.75 |        |
| Age_Groupold:RaceAA:cenEnergy           | 178.34  | <0.001 |
| Age_Groupold:PovStatBelow:cenEnergy     | 181.11  | <0.001 |
| SexMen:RaceAA:PovStatBelow              | -429.85 |        |
| SexMen:RaceAA:cenEnergy                 | 41.94   | <0.05  |
| SexMen:PovStatBelow:cenEnergy           | 42.21   |        |
| RaceAA:PovStatBelow:cenEnergy           | 78.91   | <0.001 |
| cenAge:Age_Groupold:SexMen:RaceAA       | 0.21    |        |
| cenAge:Age_Groupold:SexMen:PovStatBelow | -109.59 |        |
| cenAge:Age_Groupold:SexMen:cenEnergy    | -98.77  | <0.01  |

|                                                   |         |        |
|---------------------------------------------------|---------|--------|
| cenAge:Age_Groupold:RaceAA:PovStatBelow           | 29.19   |        |
| cenAge:Age_Groupold:RaceAA:cenEnergy              | -64.36  |        |
| cenAge:Age_Groupold:PovStatBelow:cenEnergy        | -26.39  |        |
| cenAge:SexMen:RaceAA:PovStatBelow                 | 365.06  |        |
| cenAge:SexMen:RaceAA:cenEnergy                    | -12.50  |        |
| cenAge:SexMen:PovStatBelow:cenEnergy              | 72.03   | <0.05  |
| cenAge:RaceAA:PovStatBelow:cenEnergy              | 65.74   | <0.05  |
| Age_Groupold:SexMen:RaceAA:PovStatBelow           | 1109.37 |        |
| Age_Groupold:SexMen:RaceAA:cenEnergy              | -165.55 | <0.001 |
| Age_Groupold:SexMen:PovStatBelow:cenEnergy        | -137.03 | <0.05  |
| Age_Groupold:RaceAA:PovStatBelow:cenEnergy        | -311.46 | <0.001 |
| SexMen:RaceAA:PovStatBelow:cenEnergy              | -98.59  | <0.01  |
| cenAge:Age_Groupold:SexMen:RaceAA:PovStatBelow    | -351.45 |        |
| cenAge:Age_Groupold:SexMen:RaceAA:cenEnergy       | 118.03  | <0.01  |
| cenAge:Age_Groupold:SexMen:PovStatBelow:cenEnergy | -7.30   |        |
| cenAge:Age_Groupold:RaceAA:PovStatBelow:cenEnergy | 65.43   |        |
| cenAge:SexMen:RaceAA:PovStatBelow:cenEnergy       | -90.30  | <0.01  |
| Age_Groupold:SexMen:RaceAA:PovStatBelow:cenEnergy | 225.44  | <0.001 |

---

Abbreviations: cenAge – centered age, Age\_Groupold – Age\_group ( $\geq 50$  years vs 30-49.9 years), SexMen – Sex(Men vs women), PovStatBelow – Poverty status (<125% vs >125% poverty), cenEnergy – centered Energy, UsedCigEver – Cigarette smoker(yes vs no)

Table S3. Comparison of biomarkers for normal nutritional status and at-risk for malnutrition groups:

Wave 4 of HANDLS study

Abbreviations: HANDLS – Healthy Aging in Neighborhoods of Diversity across the Life Span

| <b>Biomarker</b>                           | <b>Normal<br/>Nutritional Status<br/>(n=435)</b> | <b>At-risk for<br/>Malnutrition<br/>(n=311)</b> | <b>p value</b> |
|--------------------------------------------|--------------------------------------------------|-------------------------------------------------|----------------|
| WBC count (count*10 <sup>9</sup> /L), X±SE | 6.38±0.10                                        | 6.67±0.13                                       | 0.071          |
| Ferritin (ng/mL), X±SE                     | 151.45±8.05                                      | 164.84±10.60                                    | 0.306          |
| Platelet count (10 <sup>9</sup> /L), X±SE  | 236.12±3.24                                      | 238.02±4.33                                     | 0.720          |
| Triglycerides (mg/dL), X±SE                | 118.62±3.10                                      | 117.00±3.44                                     | 0.728          |
| Cholesterol [(C)/HDL-C], X±SE              | 3.54±0.55                                        | 3.42±0.08                                       | 0.169          |
| Magnesium (mg/dL), X±SE                    | 1.99±0.01                                        | 1.96±0.01                                       | 0.086          |

Table S4. Predictors of Risk for Malnutrition determined by Mini Nutritional Assessment Score of Wave 4

HANDLS study participants

| Variables            | $\beta$ (SE)    | p            |
|----------------------|-----------------|--------------|
| Sex                  | -0.099 (0.188)  | 0.597        |
| Race                 | -0.163 (0.178)  | 0.359        |
| Poverty              | -0.429 (0.187)  | <b>0.022</b> |
| Hypertension         | -0.386 (0.222)  | 0.082        |
| Diabetes             | -0.073 (0.099)  | 0.461        |
| Cigarette smoker     | -0.414 (0.118)  | <b>0.000</b> |
| Age                  | 0.016 (0.021)   | 0.460        |
| Energy               | 0.000 (0.000)   | <b>0.019</b> |
| Food insecurity      | 0.769 (0.221)   | <b>0.001</b> |
| Protein, % of energy | 29.166 (10.284) | <b>0.005</b> |
| Protein change       | -11.459 (7.777) | 0.141        |

Abbreviations: HANDLS – Healthy Aging in Neighborhoods of Diversity across the Life Span.  
 Bolded font was used to emphasize p -values significant at <0.05 level.
